# Supplementary material
Source: PubMed Central journal article supplement (PMC2889047)
Supplement: 0911494107_pnas.200911494SI.pdf [file 0911494107_pnas.200911494SI.pdf]

# Supporting Information

Levy et al. 10.1073/pnas.0911494107

## SI Text

**Framingham Heart Study.** The Framingham Heart Study began in 1948 when an original cohort of 5,209 men and women who were 28–62 years of age were enrolled. In 1971, recruitment of an offspring cohort occurred; this cohort consisted of 5,124 children and spouses of children of the original cohort (mean age = 37 years; 52% women). Leukocyte telomere length (LTL) measurements and genotyping results were available for 1,150 (558 men and 592 women) offspring participants who attended the sixth examination cycle (1995–1998). The final number of subjects with complete information on telomere length and imputed genotyping data was 1,146 (557 men and 589 women).

**Family Heart Study.** The National Heart, Lung, and Blood Institute (NHLBI) Family Heart Study was begun in 1992 with the ascertainment of 1,200 families, of which one-half were randomly sampled and one-half were selected because of an excess of coronary heart disease or risk factor abnormalities compared with age- and sex-specific population rates. The families, consisting of ~6,000 individuals, were sampled on the basis of information on probands from three population-based parent studies: the Framingham Heart Study, the Utah Family Tree Study, and two centers of the Atherosclerosis Risk in Communities (ARIC) study (Minneapolis, MN and Forsyth County, NC). Approximately 8 years later, study participants belonging to the largest pedigrees were invited for a second clinical examination. A total of 2,757 subjects of European descent in 510 extended families were examined; this sample is the focus of the LTL genome-wide association (GWA) study. A two-stage design was adopted for the GWA. In the first stage, 1,007 individuals of European descent were chosen, equally distributed between the upper and lower quartile of age- and sex-adjusted values for coronary artery calcification, and assessed by computerized tomography scan. These subjects were chosen to be largely unrelated; 34% of the subjects were from unique families, whereas 200 other subjects had one or more siblings selected into the sample, yielding a total sample of 465 unrelated subjects and 542 relatives. LTL measurements were available for 907 of these subjects. Thirty subjects overlapped with the Framingham Heart Study and were removed, leaving a final sample size of 877. The remaining family members were genotyped in the second stage for replication of the top hits from the first stage. Table S7 shows the demographics for the replication sample.

**Cardiovascular Health Study.** The Cardiovascular Health Study (CHS) is a multisite observational cohort study designed to evaluate risk factors for heart disease and stroke in adults aged 65 and older. The study was initiated in 1989 with the recruitment of 5,201 older adults, primarily whites, from four clinical field centers: Forsyth County, NC, Sacramento County, CA, Washington County, MD, and Pittsburgh, PA. Beginning in 1992, 687 African Americans were recruited. To reduce the possibility of confounding by population stratification, African-American participants were not included in the CHS GWA. The samples for LTL measurements were collected between 1989 and 1990. The sample size of whites of European descent with GWA and LTL data was 1,061 men and women.

**Bogalusa Heart Study.** The Bogalusa Heart Study (BHS) is a biracial (African Americans and individuals of European descent) community-based longitudinal study of the early natural history of cardiovascular disease beginning in childhood. GWA was per-

formed on white BHS participants with LTL measurements (obtained from samples collected between 2001 and 2002) and genotype data after filtering for relatedness.

**TwinsU.K.** TwinsU.K. I and II cohort ([www.twinsuk.ac.uk](http://www.twinsuk.ac.uk)) is an adult twin British registry shown to be representative of singleton populations and the United Kingdom population. LTL and genotypic data were available for 1,194 (TwinsU.K. I) and 1,682 (TwinsU.K. II) women.

**ACKNOWLEDGMENTS.** We thank the staffs from the Genotyping Facilities at the Wellcome Trust Sanger Institute for sample preparation (quality control and genotyping led by Leena Peltonen and Panos Deloukas), the Le Centre National de Génotypage, France, (led by Mark Lathrop) for genotyping, Duke University (led by David Goldstein) for genotyping, and the Finnish Institute of Molecular Medicine, Finnish Genome Center, University of Helsinki (led by Aarno Palotie). The research reported in this article was supported by National Heart, Lung, and Blood Institute's Grants R01AG21593 and R01AG20132. The National Heart, Lung, and Blood Institute's Framingham Heart Study is a joint project of the National Institutes of Health and Boston University School of Medicine, and it was supported by the National Heart, Lung, and Blood Institute's Framingham Heart Study (Contract No. N01-HC-25195) and its contract with Affymetrix, Inc. for genotyping services (Contract N02-HL-6-4278). Analyses reflect the efforts and resource development from the Framingham Heart Study investigators participating in the SNP Health Association Resource (SHARe) project. A portion of this research was conducted using the Linux Cluster for Genetic Analysis (LinGA-II) funded by the Robert Dawson Evans Endowment of the Department of Medicine at Boston University School of Medicine and Boston Medical Center. The Family Heart Study was supported by cooperative agreements U01 HL67893, U01 HL67894, U01 HL67895, U01 HL67896, U01 HL67897, U01 HL67898, U01 HL67899, U01 HL67900, U01 HL67901, U01 HL67902, U01 HL56563, U01 HL56564, U01 HL56565, U01 HL56566, U01 HL56567, U01 HL56568, and U01 HL56569. A full list of Family Heart Study investigators and institutions can be found at <https://dsgweb.wustl.edu/scan/directory.html>. The CHS research reported in this article was supported by Contracts N01-HC-85079 through N01-HC-85086, N01-HC-35129, N01-HC-15103, N01-HC-55222, N01-HC-75150, and N01-HC-45133 and Grants U01 HL080295 and R01 HL087652 from the National Heart, Lung, and Blood Institute with additional contribution from the National Institute of Neurological Disorders and Stroke. A full list of principal CHS investigators and institutions can be found at <http://www.chs-nhlbi.org/pi.htm>. DNA handling and genotyping was supported in part by the National Center for Research Resources Grant M01RR00425 (to the Cedars-Sinai General Clinical Research Center Genotyping Core) and the National Institute of Diabetes and Digestive and Kidney Diseases Grant DK063491 (to the Southern California Diabetes Endocrinology Research Center). The Bogalusa Heart Study was supported by Grant R01AG16592 from the National Institute on Aging and Grant 0855082E from the American Heart Association. TwinsU.K. research was funded by the Wellcome Trust, the European Community's Seventh Framework Programme (FP7/2007-2013)/ Grant Agreement HEALTH-F2-2008-201865-GEFOS (FP7/2007-2013), the European Network for Genetic and Genomic Epidemiology Project Grant Agreement HEALTH-F4-2007-

201413, and the FP-5 GenomEUtwin Project (QLG2-CT-2002-01254). The study received support from the Department of Health through the National Institute for Health Research (NIHR) comprehensive Biomedical Research Centre award to Guy's and St. Thomas' National Health Service Foundation Trust in partnership with King's College, London. The project

also received support from the Biotechnology and Biological Sciences Research Council Grant G20234. The authors acknowledge the funding and support of the National Eye Institute through a National Institutes of Health/Center for Inherited Disease Research genotyping project (Principal Investigator was Terri Young). T.D.S. is an NIHR senior investigator.

**Table S1. GWA results within each cohort for SNPs with meta-analysis  $P < 5 \times 10^{-7}$**

| SNP        | Chr | Position  | Nearest gene | Bogalusa Heart Study |         |      | Cardiovascular Health Study |         |      | Family Heart Study |         |      | Framingham Heart Study |         |      |          |
|------------|-----|-----------|--------------|----------------------|---------|------|-----------------------------|---------|------|--------------------|---------|------|------------------------|---------|------|----------|
|            |     |           |              | <i>P</i>             | $\beta$ | SE   | <i>P</i>                    | $\beta$ | SE   | <i>P</i>           | $\beta$ | SE   | <i>P</i>               | $\beta$ | SE   | <i>P</i> |
| rs4387287  | 10  | 105667887 | OBFC1        | 3.87E-09             | 0.06    | 0.08 | 4.84E-01                    | 0.14    | 0.04 | 5.69E-04           | 0.12    | 0.04 | 5.02E-03               | 0.11    | 0.03 | 9.03E-05 |
| rs9420907  | 10  | 105666455 | OBFC1        | 2.01E-08             | -0.04   | 0.15 | 7.76E-01                    | -0.13   | 0.04 | 5.24E-04           | -0.10   | 0.04 | 2.28E-02               | -0.12   | 0.03 | 8.27E-05 |
| rs9419958  | 10  | 105665936 | OBFC1        | 2.08E-08             | 0.04    | 0.15 | 7.76E-01                    | 0.13    | 0.04 | 5.26E-04           | 0.10    | 0.04 | 2.28E-02               | 0.12    | 0.03 | 8.58E-05 |
| rs2487999  | 10  | 105649816 | OBFC1        | 2.69E-08             | 0.07    | 0.18 | 6.94E-01                    | 0.12    | 0.04 | 3.81E-03           | 0.15    | 0.05 | 2.72E-03               | 0.14    | 0.04 | 1.19E-04 |
| rs4452212  | 2   | 136732461 | CXCR4        | 2.94E-08             | -0.15   | 0.05 | 5.25E-03                    | -0.10   | 0.03 | 4.03E-05           | -0.00   | 0.03 | 9.35E-01               | -0.10   | 0.03 | 5.68E-05 |
| rs4072435  | 2   | 136730371 | CXCR4        | 2.96E-08             | -0.15   | 0.05 | 5.27E-03                    | -0.10   | 0.03 | 3.99E-05           | -0.00   | 0.03 | 9.35E-01               | -0.10   | 0.03 | 5.83E-05 |
| rs13024450 | 2   | 136731081 | CXCR4        | 2.96E-08             | -0.15   | 0.05 | 5.26E-03                    | -0.10   | 0.03 | 3.99E-05           | -0.00   | 0.03 | 9.35E-01               | -0.10   | 0.03 | 5.81E-05 |
| rs13018756 | 2   | 136724705 | CXCR4        | 2.99E-08             | -0.15   | 0.05 | 5.29E-03                    | -0.10   | 0.03 | 3.68E-05           | -0.00   | 0.03 | 9.35E-01               | -0.10   | 0.03 | 6.19E-05 |
| rs13004902 | 2   | 136744150 | CXCR4        | 3.71E-08             | 0.15    | 0.05 | 5.04E-03                    | 0.10    | 0.03 | 4.94E-05           | 0.00    | 0.03 | 9.43E-01               | 0.10    | 0.03 | 5.58E-05 |
| rs12691881 | 2   | 136746138 | CXCR4        | 3.76E-08             | 0.15    | 0.05 | 4.94E-03                    | 0.10    | 0.03 | 5.17E-05           | 0.00    | 0.03 | 9.43E-01               | 0.10    | 0.03 | 5.41E-05 |
| rs10883943 | 10  | 105641406 | OBFC1        | 6.09E-08             | -0.12   | 0.06 | 3.12E-02                    | -0.08   | 0.03 | 2.77E-03           | -0.07   | 0.03 | 9.07E-03               | -0.07   | 0.02 | 1.88E-03 |
| rs10786775 | 10  | 105647306 | OBFC1        | 6.13E-08             | -0.03   | 0.09 | 7.13E-01                    | -0.12   | 0.04 | 3.30E-03           | -0.15   | 0.05 | 2.72E-03               | -0.14   | 0.04 | 1.19E-04 |
| rs10786774 | 10  | 105634313 | OBFC1        | 6.29E-08             | -0.03   | 0.09 | 7.13E-01                    | -0.12   | 0.04 | 2.85E-03           | -0.15   | 0.05 | 2.72E-03               | -0.14   | 0.04 | 1.40E-04 |
| rs4918068  | 10  | 105634726 | OBFC1        | 6.33E-08             | 0.03    | 0.09 | 7.14E-01                    | 0.12    | 0.04 | 2.85E-03           | 0.15    | 0.05 | 2.72E-03               | 0.14    | 0.04 | 1.41E-04 |
| rs11598840 | 10  | 105635171 | OBFC1        | 6.43E-08             | 0.03    | 0.09 | 7.14E-01                    | 0.12    | 0.04 | 2.85E-03           | 0.15    | 0.05 | 2.72E-03               | 0.14    | 0.04 | 1.43E-04 |
| rs10883942 | 10  | 105641376 | OBFC1        | 6.49E-08             | 0.12    | 0.06 | 3.12E-02                    | 0.08    | 0.03 | 2.97E-03           | 0.07    | 0.03 | 9.07E-03               | 0.07    | 0.02 | 1.89E-03 |
| rs11191849 | 10  | 105640870 | OBFC1        | 6.50E-08             | -0.12   | 0.06 | 3.11E-02                    | -0.08   | 0.03 | 2.97E-03           | -0.07   | 0.03 | 9.07E-03               | -0.07   | 0.02 | 1.89E-03 |
| rs11191848 | 10  | 105640827 | OBFC1        | 6.52E-08             | 0.12    | 0.06 | 3.11E-02                    | 0.08    | 0.03 | 2.97E-03           | 0.07    | 0.03 | 9.07E-03               | 0.07    | 0.02 | 1.90E-03 |
| rs10883941 | 10  | 105640772 | OBFC1        | 6.54E-08             | -0.12   | 0.06 | 3.11E-02                    | -0.08   | 0.03 | 2.97E-03           | -0.07   | 0.03 | 9.07E-03               | -0.07   | 0.02 | 1.90E-03 |
| rs2488000  | 10  | 105661099 | OBFC1        | 6.81E-08             | 0.04    | 0.09 | 6.94E-01                    | 0.12    | 0.04 | 3.55E-03           | 0.15    | 0.05 | 2.72E-03               | 0.14    | 0.04 | 1.19E-04 |
| rs2488001  | 10  | 105661122 | OBFC1        | 6.96E-08             | 0.04    | 0.09 | 6.86E-01                    | 0.12    | 0.04 | 3.57E-03           | 0.15    | 0.05 | 2.72E-03               | 0.14    | 0.04 | 1.19E-04 |
| rs911547   | 10  | 105629411 | OBFC1        | 6.98E-08             | 0.01    | 0.08 | 9.32E-01                    | 0.13    | 0.04 | 5.42E-04           | 0.11    | 0.04 | 1.09E-02               | -0.11   | 0.03 | 3.88E-04 |
| rs1265165  | 10  | 105661517 | OBFC1        | 7.01E-08             | 0.04    | 0.09 | 6.84E-01                    | 0.12    | 0.04 | 3.59E-03           | 0.15    | 0.05 | 2.72E-03               | 0.14    | 0.04 | 1.19E-04 |
| rs2756116  | 10  | 105661794 | OBFC1        | 7.05E-08             | 0.04    | 0.09 | 6.82E-01                    | 0.12    | 0.04 | 3.60E-03           | 0.15    | 0.05 | 2.72E-03               | 0.14    | 0.04 | 1.19E-04 |
| rs11591710 | 10  | 105677622 | OBFC1        | 7.87E-08             | 0.01    | 0.08 | 8.50E-01                    | 0.14    | 0.04 | 8.94E-04           | 0.10    | 0.04 | 2.28E-02               | -0.12   | 0.03 | 7.32E-05 |
| rs2736428  | 6   | 31951903  | SLC44A4      | 8.59E-08             | -0.04   | 0.12 | 7.21E-01                    | 0.09    | 0.03 | 4.50E-04           | 0.08    | 0.03 | 8.43E-03               | 0.07    | 0.02 | 1.81E-03 |
| rs10221893 | 2   | 136730076 | CXCR4        | 1.12E-07             | -0.3    | 0.11 | 5.49E-03                    | -0.10   | 0.03 | 4.00E-05           | 0.00    | 0.03 | 9.35E-01               | -0.10   | 0.03 | 5.86E-05 |
| rs6430612  | 2   | 136722668 | CXCR4        | 1.15E-07             | -0.3    | 0.11 | 5.49E-03                    | -0.10   | 0.03 | 3.71E-05           | 0.00    | 0.03 | 9.35E-01               | -0.10   | 0.03 | 6.31E-05 |
| rs1975174  | 19  | 22307091  | ZNF676       | 1.20E-07             | 0.12    | 0.05 | 2.07E-02                    | 0.05    | 0.03 | 6.08E-02           | -0.06   | 0.03 | 2.75E-02               | 0.09    | 0.02 | 4.25E-05 |
| rs9325507  | 10  | 105635612 | OBFC1        | 1.39E-07             | -0.12   | 0.06 | 3.04E-02                    | -0.08   | 0.03 | 3.18E-03           | -0.07   | 0.03 | 8.04E-03               | -0.06   | 0.02 | 4.09E-03 |
| rs7259376  | 19  | 22299545  | LOC148198    | 1.44E-07             | -0.12   | 0.05 | 2.83E-02                    | -0.05   | 0.03 | 5.88E-02           | -0.06   | 0.03 | 2.75E-02               | -0.09   | 0.02 | 4.56E-05 |
| rs11598018 | 10  | 105651305 | OBFC1        | 1.44E-07             | -0.12   | 0.06 | 3.26E-02                    | -0.08   | 0.03 | 3.67E-03           | -0.07   | 0.03 | 8.04E-03               | -0.06   | 0.02 | 3.62E-03 |
| rs12765878 | 10  | 105659612 | OBFC1        | 1.45E-07             | 0.12    | 0.06 | 3.26E-02                    | 0.08    | 0.03 | 3.71E-03           | 0.07    | 0.03 | 8.04E-03               | 0.06    | 0.02 | 3.62E-03 |
| rs4954585  | 2   | 136714864 | CXCR4        | 1.45E-07             | -0.14   | 0.06 | 1.71E-02                    | -0.11   | 0.03 | 5.53E-05           | -0.02   | 0.03 | 5.98E-01               | -0.09   | 0.03 | 6.06E-04 |
| rs2273698  | 10  | 105639148 | OBFC1        | 1.54E-07             | -0.12   | 0.06 | 3.05E-02                    | -0.08   | 0.03 | 3.95E-03           | -0.07   | 0.03 | 8.04E-03               | -0.06   | 0.02 | 3.75E-03 |
| rs3814220  | 10  | 105637290 | OBFC1        | 1.55E-07             | 0.12    | 0.06 | 3.05E-02                    | 0.08    | 0.03 | 3.97E-03           | 0.07    | 0.03 | 8.04E-03               | 0.06    | 0.02 | 3.76E-03 |
| rs8081000  | 17  | 39070759  | MEOX1        | 1.59E-07             | 0.03    | 0.12 | 8.23E-01                    | -0.04   | 0.03 | 1.45E-01           | 0.14    | 0.03 | 1.39E-06               | 0.07    | 0.02 | 2.64E-03 |
| rs351089   | 4   | 132636028 | PCDH10       | 2.16E-07             | -0.06   | 0.21 | 7.75E-01                    | NA      | NA   | NA                 | -0.50   | 0.14 | 2.33E-04               | -0.49   | 0.11 | 1.14E-05 |
| rs11668269 | 19  | 22305800  | LOC148198    | 2.33E-07             | -0.23   | 0.11 | 2.87E-02                    | -0.05   | 0.03 | 4.48E-02           | -0.06   | 0.03 | 2.75E-02               | 0.09    | 0.02 | 4.47E-05 |
| rs808373   | 19  | 22261073  | ZNF676       | 2.37E-07             | -0.12   | 0.05 | 2.92E-02                    | 0.05    | 0.03 | 1.09E-01           | -0.06   | 0.03 | 4.60E-02               | -0.09   | 0.02 | 2.10E-05 |
| rs8111537  | 19  | 22327385  | LOC148198    | 3.06E-07             | -0.14   | 0.05 | 9.18E-03                    | -0.04   | 0.03 | 1.16E-01           | -0.06   | 0.03 | 1.95E-02               | -0.09   | 0.02 | 1.10E-04 |
| rs1980653  | 10  | 105644154 | OBFC1        | 3.09E-07             | 0.24    | 0.11 | 3.08E-02                    | -0.08   | 0.03 | 3.60E-03           | 0.07    | 0.03 | 8.04E-03               | 0.06    | 0.02 | 3.65E-03 |
| rs11191841 | 10  | 105629601 | OBFC1        | 3.11E-07             | 0.13    | 0.06 | 2.40E-02                    | 0.08    | 0.03 | 4.81E-03           | 0.08    | 0.03 | 7.33E-03               | 0.06    | 0.02 | 7.42E-03 |
| rs7100920  | 10  | 105630968 | OBFC1        | 3.25E-07             | -0.12   | 0.06 | 3.03E-02                    | -0.07   | 0.03 | 4.64E-03           | -0.07   | 0.03 | 8.04E-03               | -0.06   | 0.02 | 6.51E-03 |

**Table S2. Meta-analysis of GWA results for men and women for all SNPs with  $P < 5 \times 10^{-7}$  in the combined analysis**

| SNP        | Chr | Position  | Closest gene | Women   |      |          | Men     |      |          |
|------------|-----|-----------|--------------|---------|------|----------|---------|------|----------|
|            |     |           |              | $\beta$ | SE   | $P$      | $\beta$ | SE   | $P$      |
| rs4387287  | 10  | 105667887 | OBFC1        | 0.12    | 0.03 | 1.32E-05 | 0.11    | 0.03 | 5.94E-05 |
| rs9420907  | 10  | 105666455 | OBFC1        | -0.11   | 0.03 | 8.20E-05 | -0.12   | 0.03 | 5.30E-05 |
| rs9419958  | 10  | 105665936 | OBFC1        | 0.11    | 0.03 | 8.47E-05 | 0.12    | 0.03 | 5.32E-05 |
| rs2487999  | 10  | 105649816 | OBFC1        | 0.12    | 0.03 | 1.79E-04 | 0.14    | 0.03 | 2.85E-05 |
| rs4452212  | 2   | 136732461 | CXCR4        | -0.10   | 0.02 | 4.27E-07 | -0.05   | 0.02 | 9.84E-03 |
| rs4072435  | 2   | 136730371 | CXCR4        | -0.10   | 0.02 | 4.33E-07 | -0.05   | 0.02 | 9.89E-03 |
| rs13024450 | 2   | 136731081 | CXCR4        | -0.10   | 0.02 | 4.30E-07 | -0.05   | 0.02 | 9.88E-03 |
| rs13018756 | 2   | 136724705 | CXCR4        | -0.10   | 0.02 | 4.55E-07 | -0.06   | 0.02 | 9.66E-03 |
| rs13004902 | 2   | 136744150 | CXCR4        | 0.10    | 0.02 | 4.97E-07 | 0.05    | 0.02 | 1.06E-02 |
| rs12691881 | 2   | 136746138 | CXCR4        | 0.10    | 0.02 | 5.05E-07 | 0.05    | 0.02 | 1.05E-02 |
| rs10883943 | 10  | 105641406 | OBFC1        | -0.08   | 0.02 | 2.41E-05 | -0.07   | 0.02 | 5.42E-04 |
| rs10786775 | 10  | 105647306 | OBFC1        | -0.12   | 0.03 | 1.93E-04 | -0.13   | 0.03 | 7.14E-05 |
| rs10786774 | 10  | 105634313 | OBFC1        | -0.12   | 0.03 | 1.64E-04 | -0.13   | 0.03 | 8.84E-05 |
| rs4918068  | 10  | 105634726 | OBFC1        | 0.12    | 0.03 | 1.65E-04 | 0.13    | 0.03 | 8.83E-05 |
| rs11598840 | 10  | 105635171 | OBFC1        | 0.12    | 0.03 | 1.64E-04 | 0.13    | 0.03 | 9.00E-05 |
| rs10883942 | 10  | 105641376 | OBFC1        | 0.08    | 0.02 | 2.55E-05 | 0.07    | 0.02 | 5.45E-04 |
| rs11191849 | 10  | 105640870 | OBFC1        | -0.08   | 0.02 | 2.55E-05 | -0.07   | 0.02 | 5.48E-04 |
| rs11191848 | 10  | 105640827 | OBFC1        | 0.08    | 0.02 | 2.56E-05 | 0.07    | 0.02 | 5.48E-04 |
| rs10883941 | 10  | 105640772 | OBFC1        | -0.08   | 0.02 | 2.57E-05 | -0.07   | 0.02 | 5.47E-04 |
| rs2488000  | 10  | 105661099 | OBFC1        | 0.12    | 0.03 | 2.09E-04 | 0.13    | 0.03 | 7.36E-05 |
| rs2488001  | 10  | 105661122 | OBFC1        | 0.12    | 0.03 | 2.12E-04 | 0.13    | 0.03 | 7.38E-05 |
| rs911547   | 10  | 105629411 | OBFC1        | -0.11   | 0.03 | 1.34E-04 | -0.11   | 0.03 | 1.16E-04 |
| rs1265165  | 10  | 105661517 | OBFC1        | 0.12    | 0.03 | 2.14E-04 | 0.13    | 0.03 | 7.40E-05 |
| rs2756116  | 10  | 105661794 | OBFC1        | 0.12    | 0.03 | 2.15E-04 | 0.13    | 0.03 | 7.40E-05 |
| rs11591710 | 10  | 105677622 | OBFC1        | -0.12   | 0.03 | 8.41E-05 | -0.11   | 0.03 | 2.53E-04 |
| rs2736428  | 6   | 31951903  | SLC44A4      | 0.10    | 0.02 | 2.62E-06 | 0.06    | 0.02 | 4.34E-03 |
| rs10221893 | 2   | 136730076 | CXCR4        | -0.10   | 0.02 | 8.17E-07 | -0.05   | 0.02 | 1.61E-02 |
| rs6430612  | 2   | 136722668 | CXCR4        | -0.10   | 0.02 | 8.56E-07 | -0.05   | 0.02 | 1.60E-02 |
| rs1975174  | 19  | 22307091  | ZNF676       | 0.09    | 0.02 | 8.53E-06 | 0.06    | 0.02 | 2.92E-03 |
| rs9325507  | 10  | 105635612 | OBFC1        | -0.08   | 0.02 | 4.54E-05 | -0.07   | 0.02 | 6.57E-04 |
| rs7259376  | 19  | 22299545  | LOC148198    | -0.09   | 0.02 | 9.13E-06 | -0.06   | 0.02 | 3.34E-03 |
| rs11598018 | 10  | 105651305 | OBFC1        | -0.08   | 0.02 | 4.14E-05 | -0.07   | 0.02 | 6.72E-04 |
| rs12765878 | 10  | 105659612 | OBFC1        | 0.08    | 0.02 | 4.15E-05 | 0.07    | 0.02 | 6.75E-04 |
| rs4954585  | 2   | 136714864 | CXCR4        | -0.10   | 0.02 | 1.14E-05 | -0.07   | 0.02 | 3.19E-03 |
| rs2273698  | 10  | 105639148 | OBFC1        | -0.08   | 0.02 | 4.32E-05 | -0.07   | 0.02 | 7.64E-04 |
| rs3814220  | 10  | 105637290 | OBFC1        | 0.08    | 0.02 | 4.34E-05 | 0.07    | 0.02 | 7.65E-04 |
| rs8081000  | 17  | 39070759  | MEOX1        | 0.07    | 0.02 | 7.99E-04 | 0.09    | 0.02 | 2.05E-05 |
| rs351089   | 4   | 132636028 | PCDH10       | -0.34   | 0.14 | 1.28E-02 | -0.45   | 0.11 | 2.34E-05 |
| rs11668269 | 19  | 22305800  | LOC148198    | 0.09    | 0.02 | 1.18E-05 | 0.06    | 0.02 | 4.16E-03 |
| rs808373   | 19  | 22261073  | ZNF676       | -0.09   | 0.02 | 8.43E-06 | -0.06   | 0.02 | 6.08E-03 |
| rs8111537  | 19  | 22327385  | LOC148198    | -0.08   | 0.02 | 2.17E-05 | -0.06   | 0.02 | 2.47E-03 |
| rs1980653  | 10  | 105644154 | OBFC1        | 0.07    | 0.02 | 1.51E-04 | 0.07    | 0.02 | 3.94E-04 |
| rs11191841 | 10  | 105629601 | OBFC1        | 0.08    | 0.02 | 1.15E-04 | 0.07    | 0.02 | 5.66E-04 |
| rs7100920  | 10  | 105630968 | OBFC1        | -0.07   | 0.02 | 9.22E-05 | -0.07   | 0.02 | 7.61E-04 |

**Table S3. Mean LTL by genotype of top SNPs in *OBFC1* and *CXCR4* from the four-study meta-analysis**

|                              | Genotype*              |                      |                      |
|------------------------------|------------------------|----------------------|----------------------|
|                              | 1                      | 2                    | 3                    |
| <i>OBFC1</i> rs4387287 (C/A) |                        |                      |                      |
| Men <i>N</i>                 | 6.72 (6.02–7.41) 1,087 | 6.76 (6.20–7.32) 399 | 7.12 (6.15–8.10) 40  |
| Women <i>N</i>               | 6.81 (6.23–7.39) 1,364 | 6.94 (6.34–7.53) 486 | 6.97 (6.68–7.25) 39  |
| <i>CXCR4</i> rs4452212 (A/G) |                        |                      |                      |
| Men <i>N</i>                 | 6.65 (6.10–7.21) 361   | 6.78 (6.01–7.55) 509 | 6.77 (6.12–7.42) 230 |
| Women <i>N</i>               | 6.77 (6.20–7.34) 620   | 6.85 (6.25–7.46) 904 | 6.96 (6.35–7.57) 365 |

\*Genotype 1 indicates zero copies, genotype 2 indicates one copy, and genotype 3 indicates two copies of the minor allele. The minor allele is listed second next to the rs number for each SNP. All subjects are of European descent [mean LTL (95% confidence interval) and *N*].

**Table S4. SNPs in the region of *TERC***

| SNP        | Chr | Position                | Nearest gene | Coded allele | Coded allele frequency | $\beta$ | SE   | <i>P</i> |
|------------|-----|-------------------------|--------------|--------------|------------------------|---------|------|----------|
| rs11718804 | 3   | 170941266               | TERC         | T            | 0.33                   | -0.04   | 0.02 | 7.93E-03 |
| rs16854335 | 3   | 170944265               | TERC         | T            | 0.32                   | -0.05   | 0.02 | 2.04E-03 |
| rs12638862 | 3   | 170960200               | TERC         | A            | 0.78                   | 0.06    | 0.02 | 7.31E-05 |
| rs12630450 | 3   | 170962898               | TERC         | A            | 0.77                   | 0.06    | 0.02 | 1.58E-04 |
| rs12696304 | 3   | 170963965               | TERC         | C            | 0.77                   | 0.06    | 0.02 | 1.57E-04 |
| TERC gene  | 3   | 170965092–<br>170965542 |              |              |                        |         |      |          |
| rs9822885  | 3   | 170968838               | ARPM1        | A            | 0.77                   | 0.07    | 0.02 | 5.33E-05 |
| rs9860874  | 3   | 170968965               | ARPM1        | A            | 0.22                   | -0.06   | 0.02 | 1.54E-04 |
| rs3821383  | 3   | 170972640               | MYNN         | A            | 0.78                   | 0.06    | 0.02 | 1.68E-04 |
| rs10936599 | 3   | 170974795               | MYNN         | T            | 0.22                   | -0.07   | 0.02 | 4.26E-05 |
| rs3950296  | 3   | 170975977               | MYNN         | C            | 0.78                   | 0.07    | 0.02 | 1.22E-05 |
| rs1317082  | 3   | 170980279               | MYNN         | A            | 0.78                   | 0.07    | 0.02 | 1.23E-05 |
| rs3772190  | 3   | 170983181               | MYNN         | A            | 0.21                   | -0.07   | 0.02 | 1.13E-05 |
| rs1920120  | 3   | 170984874               | MYNN         | T            | 0.76                   | 0.06    | 0.02 | 2.47E-04 |
| rs2141595  | 3   | 170986126               | MYNN         | T            | 0.23                   | -0.06   | 0.02 | 2.42E-04 |
| rs1920122  | 3   | 170988835               | MYNN         | T            | 0.23                   | -0.06   | 0.02 | 2.86E-04 |
| rs13069553 | 3   | 170990966               | MYNN         | A            | 0.80                   | 0.07    | 0.02 | 1.44E-05 |
| rs7625734  | 3   | 170991609               | LRRC34       | T            | 0.77                   | 0.06    | 0.02 | 2.74E-04 |
| rs7633750  | 3   | 170991938               | LRRC34       | A            | 0.23                   | -0.06   | 0.02 | 2.70E-04 |
| rs1997392  | 3   | 170992346               | LRRC34       | T            | 0.23                   | -0.06   | 0.02 | 6.27E-04 |
| rs9868000  | 3   | 170993483               | LRRC34       | A            | 0.23                   | -0.06   | 0.02 | 2.79E-04 |
| rs7621631  | 3   | 170994839               | LRRC34       | A            | 0.78                   | -0.07   | 0.02 | 1.49E-05 |
| rs10936600 | 3   | 170997279               | LRRC34       | A            | 0.22                   | 0.07    | 0.02 | 1.49E-05 |
| rs6793295  | 3   | 171001149               | LRRC34       | T            | 0.77                   | 0.06    | 0.02 | 6.00E-04 |
| rs9827710  | 3   | 171005081               | LRRC34       | C            | 0.23                   | -0.06   | 0.02 | 2.35E-04 |
| rs3796145  | 3   | 171007556               | LRRC34       | A            | 0.79                   | 0.07    | 0.02 | 1.20E-05 |
| rs10936601 | 3   | 171011143               | LRRC34       | T            | 0.23                   | -0.06   | 0.02 | 2.29E-04 |
| rs9831661  | 3   | 171011217               | LRRC34       | T            | 0.23                   | -0.06   | 0.02 | 2.28E-04 |
| rs9841443  | 3   | 171012770               | LRRC34       | A            | 0.46                   | -0.04   | 0.02 | 5.74E-03 |
| rs6793160  | 3   | 171017960               | LRRIQ4       | T            | 0.41                   | -0.04   | 0.01 | 8.47E-03 |
| rs10936602 | 3   | 171019331               | LRRIQ4       | T            | 0.72                   | 0.05    | 0.02 | 4.06E-03 |
| rs7632991  | 3   | 171021306               | LRRIQ4       | A            | 0.28                   | -0.05   | 0.02 | 4.04E-03 |
| rs1920119  | 3   | 171023091               | LRRIQ4       | T            | 0.59                   | 0.04    | 0.01 | 7.96E-03 |
| rs10936603 | 3   | 171028346               | LRRIQ4       | T            | 0.28                   | -0.05   | 0.02 | 8.60E-03 |
| rs12486767 | 3   | 171033453               | LRRIQ4       | A            | 0.38                   | -0.05   | 0.02 | 1.85E-03 |
| rs7647824  | 3   | 171035075               | LRRIQ4       | A            | 0.73                   | 0.05    | 0.02 | 3.20E-03 |
| rs9833035  | 3   | 171036192               | LRRIQ4       | T            | 0.28                   | -0.05   | 0.02 | 3.23E-03 |
| rs4352416  | 3   | 171036778               | LRRIQ4       | A            | 0.28                   | -0.05   | 0.02 | 3.29E-03 |
| rs2421830  | 3   | 171036823               | LRRIQ4       | A            | 0.28                   | -0.05   | 0.02 | 3.33E-03 |
| rs2421829  | 3   | 171036958               | LRRIQ4       | T            | 0.73                   | 0.05    | 0.02 | 3.35E-03 |
| rs3732451  | 3   | 171040719               | LRRC31       | T            | 0.38                   | -0.04   | 0.02 | 5.18E-03 |
| rs9831336  | 3   | 171041067               | LRRC31       | C            | 0.28                   | -0.05   | 0.02 | 3.43E-03 |
| rs12492588 | 3   | 171041405               | LRRC31       | A            | 0.28                   | -0.05   | 0.02 | 3.55E-03 |
| rs12489230 | 3   | 171041515               | LRRC31       | A            | 0.28                   | -0.05   | 0.02 | 3.58E-03 |
| rs16854453 | 3   | 171041928               | LRRC31       | A            | 0.28                   | -0.05   | 0.02 | 7.08E-03 |
| rs6785618  | 3   | 171045491               | LRRC31       | A            | 0.27                   | -0.05   | 0.02 | 3.70E-03 |
| rs11928433 | 3   | 171046144               | LRRC31       | T            | 0.73                   | 0.05    | 0.02 | 3.81E-03 |
| rs10049456 | 3   | 171046217               | LRRC31       | T            | 0.61                   | 0.04    | 0.01 | 3.16E-03 |
| rs13074500 | 3   | 171048265               | LRRC31       | T            | 0.72                   | 0.05    | 0.02 | 3.87E-03 |
| rs9290375  | 3   | 171048784               | LRRC31       | A            | 0.62                   | 0.04    | 0.02 | 6.05E-03 |
| rs11717389 | 3   | 171048941               | LRRC31       | T            | 0.72                   | 0.05    | 0.02 | 3.94E-03 |
| rs12485940 | 3   | 171049935               | LRRC31       | A            | 0.73                   | 0.05    | 0.02 | 3.97E-03 |
| rs16847897 | 3   | 171050810               | LRRC31       | A            | 0.70                   | -0.04   | 0.02 | 1.21E-02 |
| rs4955676  | 3   | 171051186               | LRRC31       | C            | 0.30                   | 0.04    | 0.02 | 1.21E-02 |
| rs4955677  | 3   | 171051204               | LRRC31       | T            | 0.70                   | 0.04    | 0.02 | 1.20E-02 |
| rs6764267  | 3   | 171051364               | LRRC31       | C            | 0.59                   | 0.04    | 0.01 | 5.82E-03 |

**Table S5. SNPs in regions previously reported**

| SNP        | Chr | Position  | Closest gene | Coded allele | Coded allele frequency | $\beta$ | SE   | <i>P</i> |
|------------|-----|-----------|--------------|--------------|------------------------|---------|------|----------|
| rs7514514  | 1   | 31180643  | PUM1         | T            | 0.28                   | 0.00    | 0.02 | 0.86     |
| rs12406355 | 1   | 31190045  | PUM1         | T            | 0.61                   | 0.01    | 0.01 | 0.73     |
| rs238102   | 1   | 227549771 | C1orf96      | A            | 0.34                   | 0.01    | 0.02 | 0.37     |
| rs238099   | 1   | 227575528 | C1orf96      | T            | 0.42                   | -0.01   | 0.01 | 0.71     |
| rs7549589  | 1   | 227586550 | C1orf96      | A            | 0.60                   | -0.02   | 0.02 | 0.17     |
| rs3102458  | 1   | 242606491 | C1orf100     | A            | 0.77                   | 0.00    | 0.02 | 0.92     |
| rs3123710  | 1   | 242611441 | C1orf100     | A            | 0.68                   | 0.00    | 0.02 | 0.91     |
| rs3003211  | 1   | 242679607 | ADSS         | T            | 0.72                   | 0.01    | 0.02 | 0.71     |
| rs1376749  | 2   | 143683862 | ARHGAP15     | A            | 0.13                   | -0.03   | 0.02 | 0.10     |
| rs12993643 | 2   | 143749432 | ARHGAP15     | A            | 0.32                   | -0.04   | 0.02 | 0.02     |
| rs4662198  | 2   | 143764197 | ARHGAP15     | T            | 0.23                   | -0.01   | 0.02 | 0.43     |
| rs1036533  | 2   | 201105969 | SGOL2        | A            | 0.08                   | 0.02    | 0.03 | 0.58     |
| rs10497853 | 2   | 201183402 | AOX1         | A            | 0.92                   | -0.01   | 0.03 | 0.66     |
| rs3774601  | 3   | 53797933  | CACNA1D      | A            | 0.38                   | 0.01    | 0.02 | 0.57     |
| rs3774605  | 3   | 53805807  | CACNA1D      | A            | 0.37                   | 0.01    | 0.02 | 0.49     |
| rs3774609  | 3   | 53807943  | CACNA1D      | T            | 0.59                   | -0.01   | 0.02 | 0.54     |
| rs1858740  | 3   | 38413376  | XYLB         | T            | 0.33                   | -0.02   | 0.01 | 0.24     |
| rs4407366  | 3   | 38496429  | ACVR2B       | T            | 0.72                   | -0.01   | 0.01 | 0.56     |
| rs7374458  | 3   | 38506215  | ACVR2B       | T            | 0.28                   | 0.01    | 0.01 | 0.66     |
| rs1907107  | 4   | 143449084 | INPP4B       | A            | 0.55                   | 0.00    | 0.01 | 0.81     |
| rs2635429  | 4   | 143463006 | INPP4B       | T            | 0.39                   | -0.01   | 0.01 | 0.69     |
| rs1497393  | 4   | 143493161 | INPP4B       | A            | 0.34                   | 0.03    | 0.02 | 0.04     |
| rs4841067  | 8   | 8784655   | MFHAS1       | A            | 0.83                   | -0.01   | 0.02 | 0.80     |
| rs11778913 | 8   | 8852300   | THEX1        | A            | 0.78                   | 0.02    | 0.02 | 0.32     |
| rs11249943 | 8   | 9645273   | TNKS         | A            | 0.83                   | 0.02    | 0.02 | 0.33     |
| rs6989782  | 8   | 9647948   | TNKS         | T            | 0.25                   | 0.00    | 0.02 | 0.83     |
| rs1570504  | 9   | 110094630 | ACTL7B       | A            | 0.17                   | 0.00    | 0.02 | 0.87     |
| rs1535619  | 9   | 110094886 | ACTL7B       | A            | 0.81                   | 0.00    | 0.02 | 0.82     |
| rs7028041  | 9   | 110096538 | ACTL7B       | A            | 0.17                   | 0.00    | 0.02 | 0.82     |
| rs9301921  | 13  | 93432990  | GPC6         | A            | 0.88                   | 0.01    | 0.02 | 0.70     |
| rs1415736  | 13  | 93444937  | GPC6         | T            | 0.12                   | -0.01   | 0.02 | 0.47     |
| rs4898848  | 14  | 54266336  | SAMD4A       | T            | 0.69                   | -0.01   | 0.02 | 0.47     |
| rs6572971  | 14  | 54280838  | SAMD4A       | T            | 0.14                   | -0.04   | 0.02 | 0.07     |
| rs1957356  | 14  | 54288744  | SAMD4A       | T            | 0.18                   | -0.01   | 0.02 | 0.45     |
| rs17214677 | 16  | 82008463  | CDH13        | A            | 0.91                   | 0.02    | 0.02 | 0.48     |
| rs11861722 | 16  | 82125547  | CDH13        | A            | 0.91                   | 0.01    | 0.02 | 0.77     |
| rs9934005  | 16  | 82137699  | CDH13        | A            | 0.23                   | 0.00    | 0.02 | 0.80     |
| rs12598842 | 16  | 82145455  | CDH13        | A            | 0.63                   | -0.02   | 0.02 | 0.14     |
| rs2162440  | 18  | 33468004  | BRUNOL4      | A            | 0.23                   | 0.02    | 0.02 | 0.24     |
| rs7235755  | 18  | 33470259  | BRUNOL4      | A            | 0.23                   | 0.02    | 0.02 | 0.35     |
| rs2217127  | 18  | 33475628  | BRUNOL4      | T            | 0.32                   | 0.03    | 0.02 | 0.04     |

**Table S6. Demographics of the Family Heart Study replication sample**

| Parameter                     | Whites     | African Americans |
|-------------------------------|------------|-------------------|
| Number of individuals         | 1,593      | 597               |
| Percent women                 | 56         | 65                |
| Mean age in years (range)     | 54 (30–93) | 53 (30–83)        |
| Mean BMI (kg/m <sup>2</sup> ) | 28.8 ± 5.8 | 32.6 ± 7.4        |



**Table S7. Technical details of genotyping, SNP exclusion, and SNP imputation methods**

| Study                                 | FraminghamHeart Study                                                                                            | Family Heart Study                                             | Cardiovascular Health Study                                                                                                          | Bogalusa Heart Study                                                                                             |
|---------------------------------------|------------------------------------------------------------------------------------------------------------------|----------------------------------------------------------------|--------------------------------------------------------------------------------------------------------------------------------------|------------------------------------------------------------------------------------------------------------------|
| Array type                            | Affymetrix 500K and MIPS 50K combined                                                                            | Illumina HumMap 550                                            | Illumina 370CNV                                                                                                                      | Illumina Human610 and Illumina HumanCVD                                                                          |
| Genotype calling algorithm            | BRLMM                                                                                                            | BeadStudio                                                     | BeadStudio                                                                                                                           | BeadStudio                                                                                                       |
| Exclusion of SNPs used for imputation | Call rate < 97%<br>Hardy-Weinberg Equilibrium (HWE) $P < 10^{-6}$ Mishap $P < 10^{-9}$<br>Mendelian errors > 100 | Call rate < 98%<br>HWE $P < 10^{-6}$                           | Call rate $\leq 95\%$<br>HWE $P < 10^{-5}$<br>More than two replicate errors or Mendelian inconsistencies heterozygote frequency = 0 | Call rate $\leq 90\%$ visual inspection of cluster plots when call rate < 95% or cluster separation score < 0.30 |
| Imputation method                     | MACH 1.0.15                                                                                                      | MACH 1.0.15                                                    | BIMBAM10 v0.99                                                                                                                       | MACH 1.0.16                                                                                                      |
| Imputation backbone (NCLBI build)     | HapMap CEU release 22; build 36                                                                                  | HapMap CEU release 22; build 36                                | HapMap CEU release 22, build 36                                                                                                      | HapMap CEU release 22; build 36                                                                                  |
| Filtering of imputed genotypes        | None                                                                                                             | HWE $P < 5 \times 10^{-5}$ minor allele frequency (MAF) < 0.01 | Variance of allele dosage < 0.005                                                                                                    | HWE p HWE $P < 5 \times 10^{-5}$ MAF < 0.01                                                                      |
| Data handling and statistical tests   | LMEKIN package in R—linear mixed-effects model incorporating familial covariance based on degree of relatedness  | PLINK                                                          | R                                                                                                                                    | NLME package in R—linear mixed-effects model incorporating multiple measures over time                           |
